# Supplementary material for: Surface-fragmenting hyperbranched copolymers with hydrolysis-generating zwitterions for antifouling coatings
Source: Royal Society of Chemistry journal article supplement (doi:10.1039/d0tb00886a), 2020-01-01
Supplement: d0tb00886a1.pdf [file d0tb00886a1.pdf]

## **Supplementary Information**

### **Surface-fragmenting Hyperbranched Copolymers with Hydrolysis-Generating Zwitterions for Antifouling Coatings**

Liqin Mei, Xiaoqing Ai, Chunfeng Ma\*, Guangzhao Zhang

*Faculty of Materials Science and Engineering, South China University of Technology,  
Guangzhou 510640, P. R. China*

\*To whom correspondence should be addressed: [msmcf@scut.edu.cn](mailto:msmcf@scut.edu.cn).

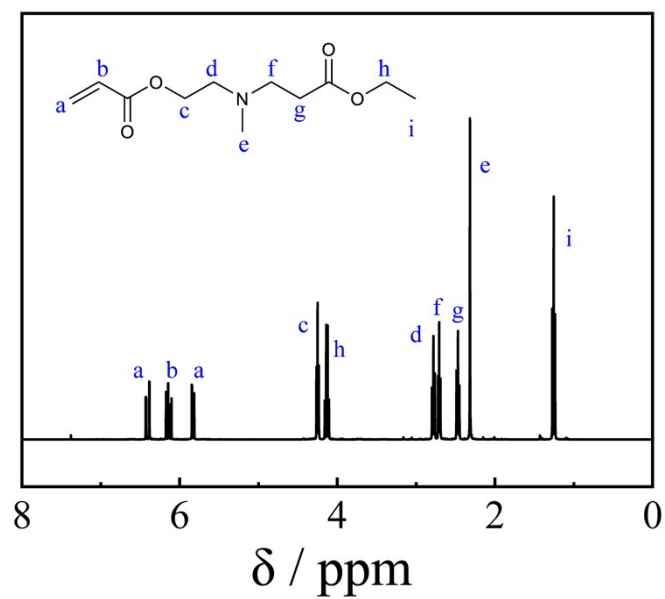

**Figure S1.** <sup>1</sup>H NMR spectrum of TCB in CDCl<sub>3</sub>.

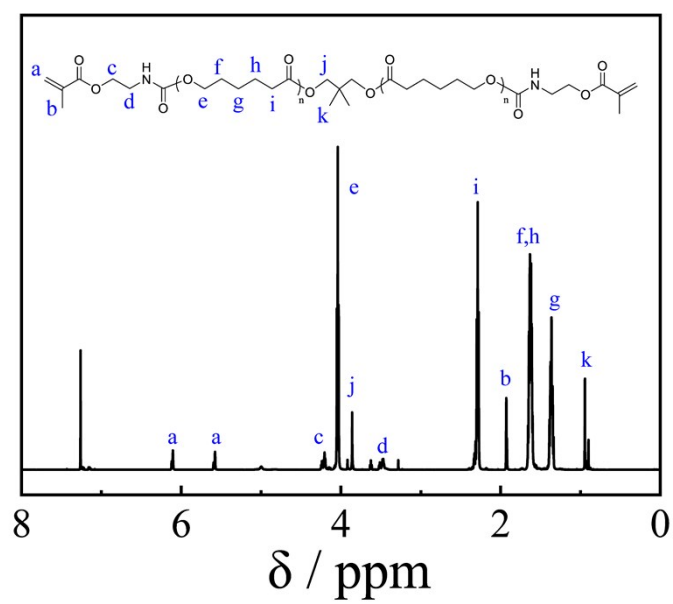

**Figure S2.** <sup>1</sup>H NMR spectrum of PCL-V<sub>2</sub> in CDCl<sub>3</sub>.

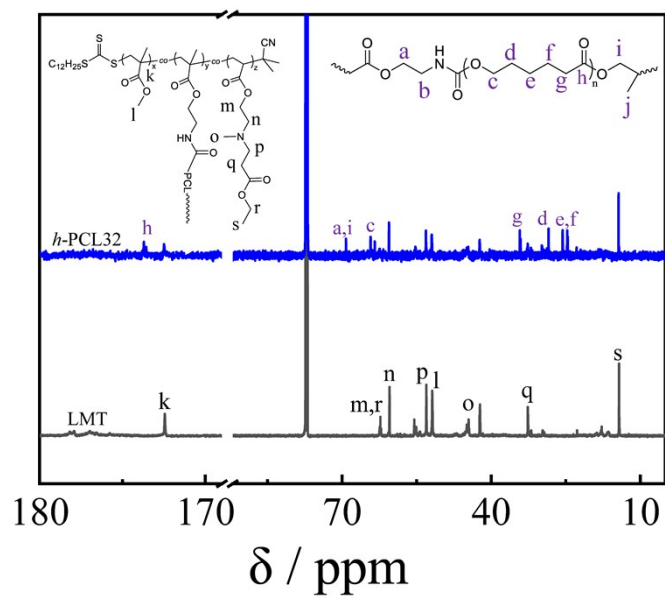

**Figure S3.**  $^{13}\text{C}$  NMR spectra of LMT and *h*-PCL32 in  $\text{CDCl}_3$ .
